# Supplementary material
Source: publisher figshare collection journal article supplement (https://acs.figshare.com/ndownloader/files/7804279)
Supplement: Supplementary file 1 [file 7804279]

# Electronic Supplementary Information

## Constructing Diketopyrrolopyrrole-Based Fluorescent Porous Organic Polymer for Chromo Communication via Guest-to-Host Energy Transfer

Shiming Bi,<sup>‡a</sup> Yankai Li,<sup>‡b</sup> Limin Wang,<sup>\*a</sup> Jun Hu,<sup>\*b</sup> and Honglai Liu<sup>b</sup>

<sup>a</sup> Key Laboratory for Advanced materials and Department of Chemistry, East China University of Science and Technology, Shanghai, 200237, China.

E-mail: [wanglimin@ecust.edu.cn](mailto:wanglimin@ecust.edu.cn)

<sup>b</sup> State Key Laboratory of Chemical Engineering and Department of Chemistry, East China University of Science and Technology, Shanghai, 200237, China.

E-mail: [junhu@ecust.edu.cn](mailto:junhu@ecust.edu.cn)

<sup>‡</sup> These authors contributed equally to this work and should be considered co-first authors.

The supporting information contains the general experimental procedures, the synthesis and characterization details of the Br-DPP-m (Schemes S1) and 2-cyano-7-diethylamin coumarin molecules, the calculation of energy transfer efficiency  $\Phi_{ET}$ , the thermogravimetric analysis of DPP-PPN-m (Fig. S1), the Fourier transform infrared spectroscopy of DPP-PPN-m (Fig. S2), the fluorescence spectra of monomers (Br-DPP-m) (Fig. S3), the pore size distribution of DPP-PPN-m (Fig. S4), the comparative analysis of data plots between fluorescence intensity and BET surface area for DPP-PPN-m (Fig. S5), the fluorescence decay profiles of DPP-PPN-m (Fig. S6), the nitrogen adsorption isotherms before and after loading of coumarin (Fig. S7), the forster analysis of coumarin@DPP-PPN-3 illustrating the spectral overlap of DPP-PPN-3 acceptor and coumarin donor (Fig. S7).

## Materials

Commercial chemicals and dry solvents were used as received. 3,6-bis(4-bromophenyl)pyrrolo[3,4-c]pyrrole-1,4(2H,5H)-dione<sup>1</sup>, tetrakis(4-ethynylphenyl)methane<sup>2</sup>, 2-cyano-7-diethylamin coumarin<sup>3</sup> were synthesized according to literature procedures.

## Synthesis of DPP-PPN-m

The synthetic route to the Br-DPP-m molecules is shown in Scheme S1; synthetic route to the DPP-PPN-m is shown in Scheme S2.

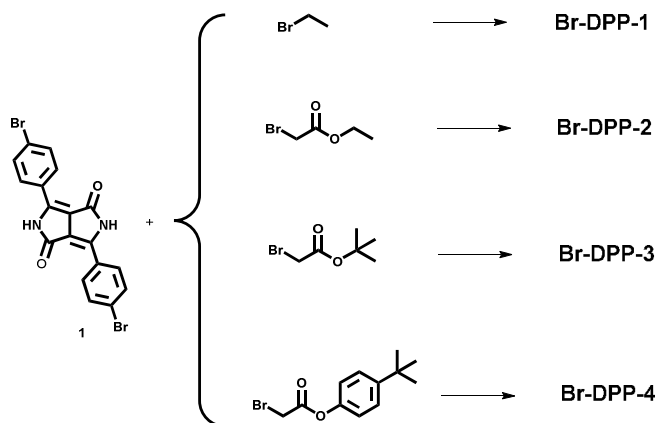

**Scheme S1** Synthesis of Br-DPP-m molecules

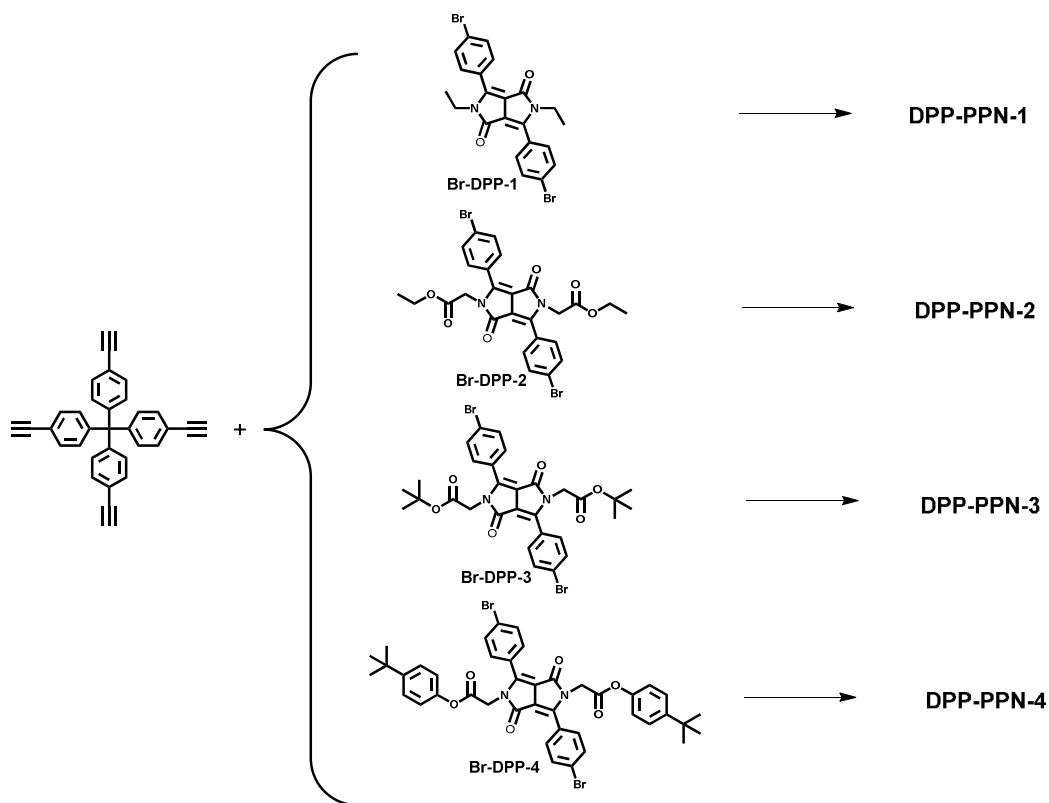

**Scheme S2** Synthesis of DPP-PPN-m

### General procedure for Br-DPP-m

Compound **1** (0.223 g, 0.5 mmol),  $K_2CO_3$  (0.276 g, 2 mmol) and 50 mL DMF were added into a three-necked flask, heated to 120°C for 30 min, alkylating agent (5 mmol) was added slowly. The mixture was kept at 120°C for 3 h. After cooled, 50 mL water was poured to quench the reaction, the mixture were filtered. The cake was dried under vacuum, then resolved in 50 mL  $CH_2Cl_2$ . The mixture was purified by column chromatography (silica gel) to give solid product.

Compound Br-DPP-1 :  $^1\text{H}$ NMR(400MHz, $\text{CDCl}_3$ ): 1.23 (t, J = 7.2 Hz, 6H), 3.76-3.82 (m, 4H), 7.66-7.68 (m, 4H), 7.69-7.72 (m, 4H);  $^{13}\text{C}$  NMR (100 MHz,  $\text{CDCl}_3$ ):  $\delta$  = 14.9, 37.0, 110.1, 125.9, 126.8, 130.1, 132.3, 147.3, 162.4 ppm; HRMS (TOF-ESI $^+$ ):  $m/z$  calcd for  $[\text{C}_{22}\text{H}_{18}\text{Br}_2\text{N}_2\text{O}_2\text{Na}]^+$ : 522.9633; found: 522.9611.

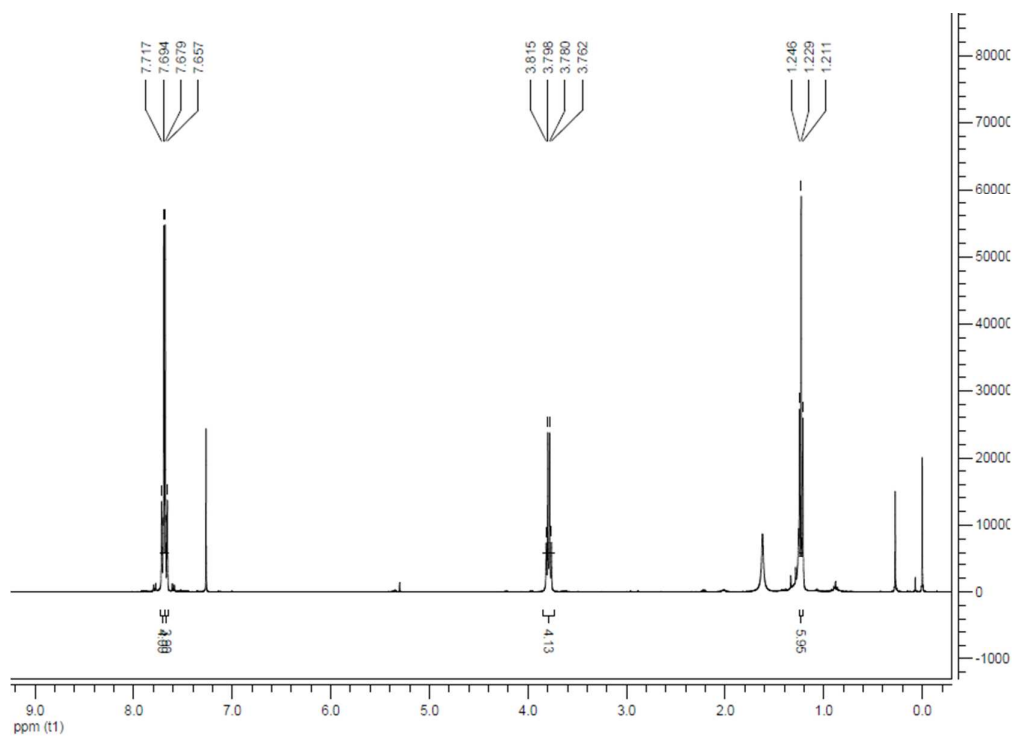

$^1\text{H}$ NMR (400MHz, $\text{CDCl}_3$ ) of Compound Br-DPP-1

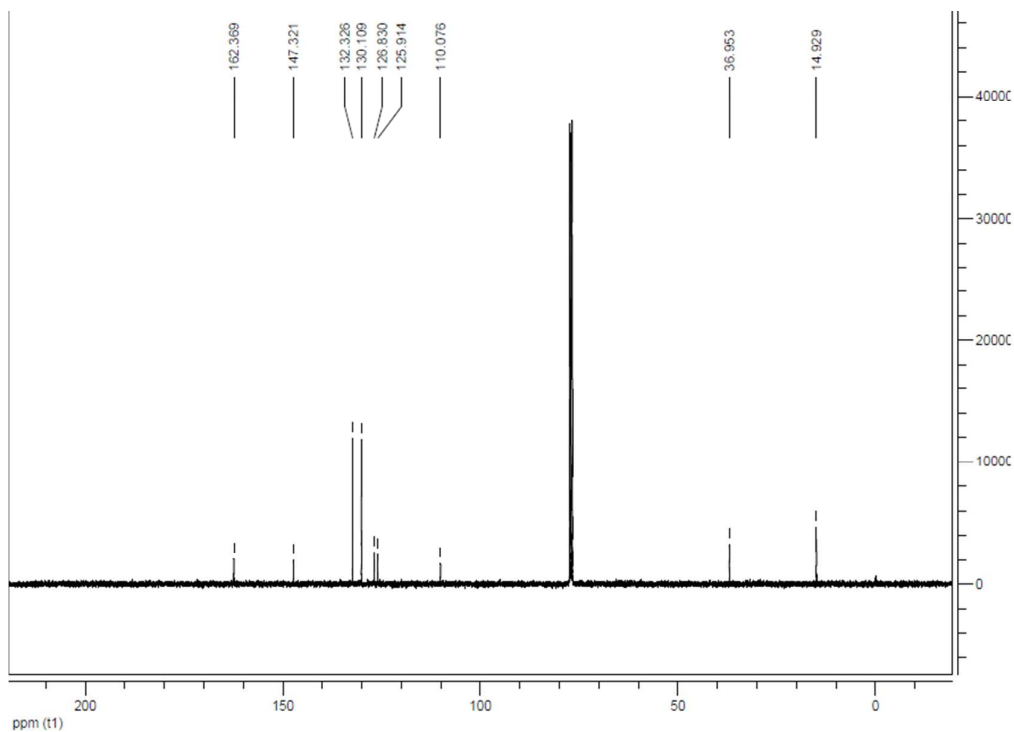

$^{13}\text{C}$  NMR (100 MHz,  $\text{CDCl}_3$ ) of Compound Br-DPP-1

#### Elemental Composition Report

Page 1

##### Single Mass Analysis

Tolerance = 50.0 PPM / DBE: min = -1.5, max = 100.0

Element prediction: Off

Number of isotope peaks used for i-FIT = 3

Monoisotopic Mass, Even Electron Ions

47 formula(e) evaluated with 1 results within limits (up to 1 closest results for each mass)

Elements Used:

C: 0-22 H: 0-19 N: 0-2 O: 0-2 Br: 0-2 Na: 0-1

LM-WANG

ECUST Institute of Fine Chem

WL-BSM-001 20 (0.218) Cm (18.21)

14-May-2016

20:59:25

1: TOF MS ES+

1.50e+003

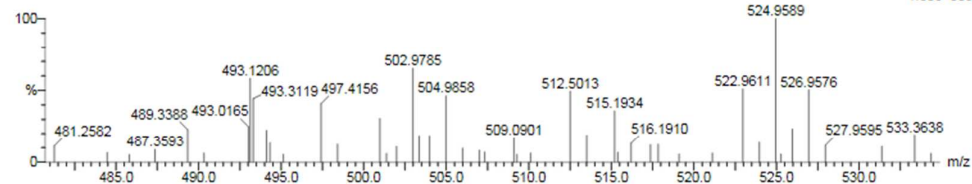

Minimum:

Maximum:

300.0 50.0 -1.5  
100.0

| Mass     | Calc. Mass | mDa  | PPM  | DBE  | i-FIT | i-FIT (Norm) | Formula              |
|----------|------------|------|------|------|-------|--------------|----------------------|
| 522.9611 | 522.9633   | -2.2 | -4.2 | 13.5 | 14.5  | 0.0          | C22 H18 N2 O2 Br2 Na |

HRMS (TOF-ESI<sup>+</sup>) of Compound Br-DPP-1

Compound Br-DPP-2 :  $^1\text{H}$ NMR (400MHz,  $\text{CDCl}_3$ ): 1.24 (t,  $J = 7.2$  Hz, 6H), 4.17-4.22 (m, 4H), 4.46 (s, 4H), 7.61-7.66 (m, 8H);  $^{13}\text{C}$  NMR (100 MHz,  $\text{CDCl}_3$ ):  $\delta = 14.1, 43.5, 62.0, 109.9, 126.3, 126.4, 130.1, 132.5, 147.3, 162.0, 168.3$  ppm; HRMS (TOF-ESI $^+$ ):  $m/z$  calcd for  $[\text{C}_{26}\text{H}_{23}\text{Br}_2\text{N}_2\text{O}_2]^+$ : 616.9923; found: 616.9940.

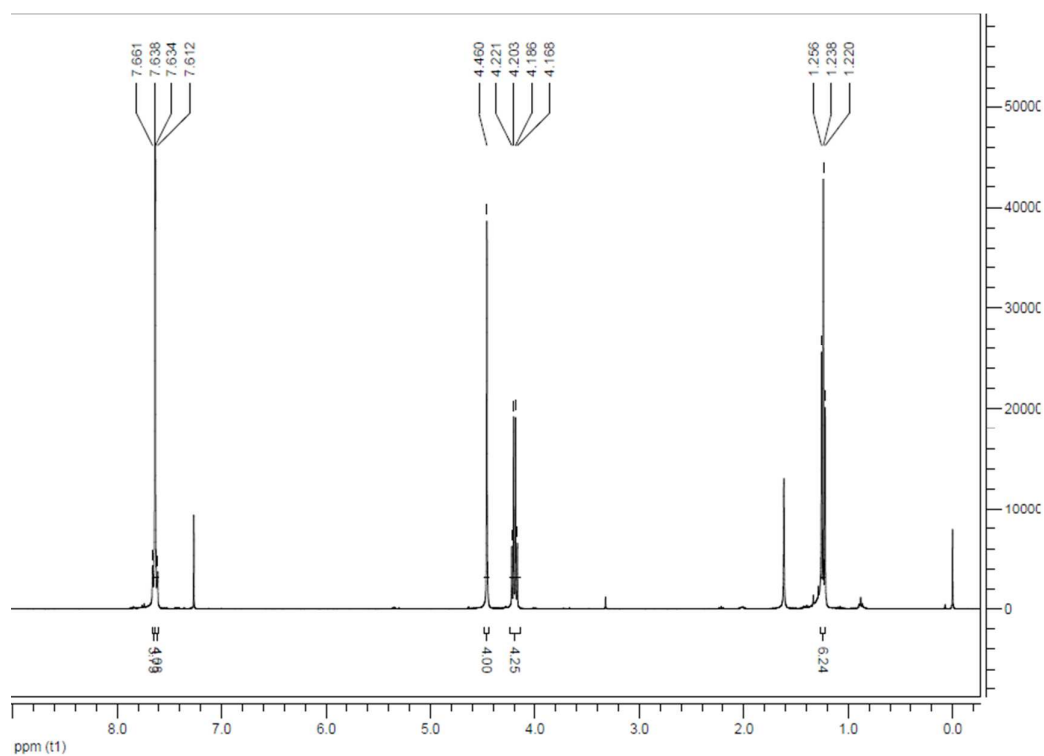

$^1\text{H}$ NMR (400MHz,  $\text{CDCl}_3$ ) of Compound Br-DPP-2

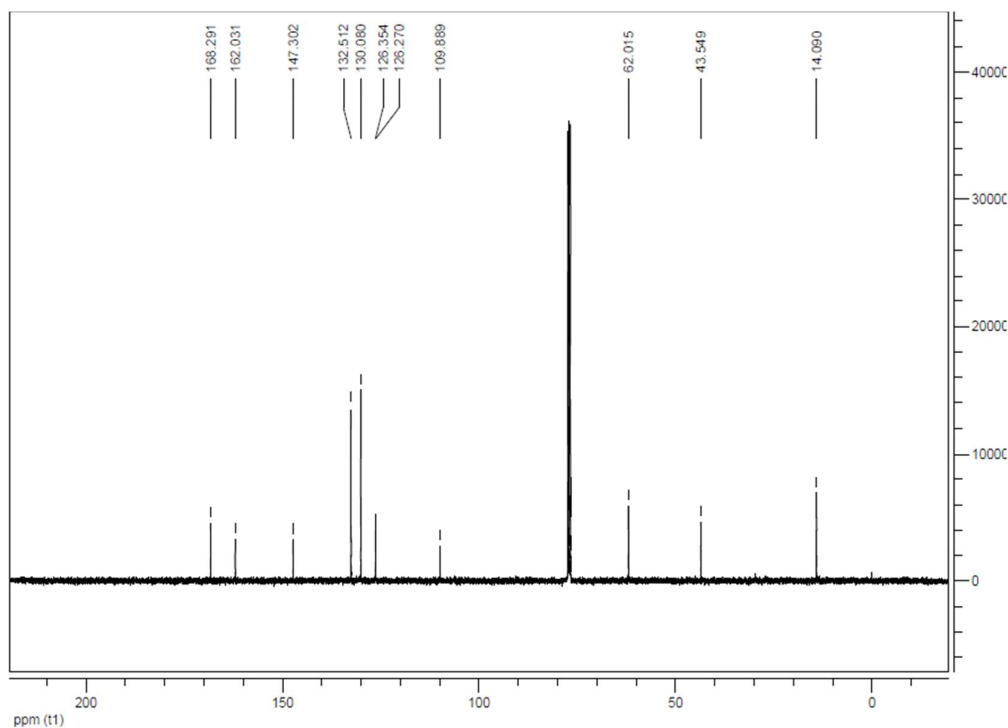

$^{13}\text{C}$  NMR (100 MHz,  $\text{CDCl}_3$ ) of Compound Br-DPP-2

#### Elemental Composition Report

Page 1

##### Single Mass Analysis

Tolerance = 50.0 PPM / DBE: min = -1.5, max = 100.0

Element prediction: Off

Number of isotope peaks used for i-FIT = 3

Monoisotopic Mass, Even Electron Ions

85 formula(e) evaluated with 1 results within limits (up to 1 closest results for each mass)

Elements Used:

C: 0-26 H: 0-23 N: 0-2 O: 0-6 Br: 0-3

LM-WANG

ECUST institute of Fine Chem

08-May-2016

WL-BSM-002 50 (0.401) Cm (47:51)

22:11:31  
1: TOF MS ES+  
3.76e+002

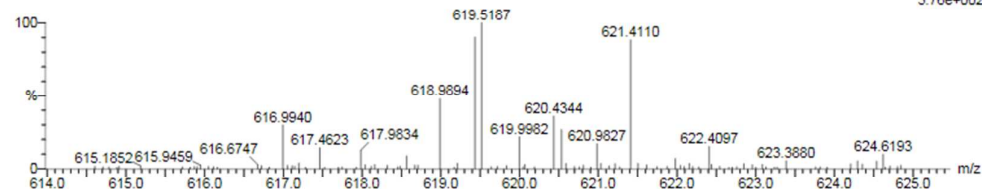

Minimum:

Maximum:

300.0

50.0

-1.5

100.0

Mass

Calc. Mass

mDa

PPM

DBE

i-FIT

i-FIT (Norm)

Formula

616.9940

616.9923

1.7

2.8

15.5

116.6

0.0

C<sub>26</sub> H<sub>23</sub> N<sub>2</sub> O<sub>6</sub> Br<sub>2</sub>

HRMS (TOF-ESI<sup>+</sup>) of Compound Br-DPP-2

Compound Br-DPP-3 :  $^1\text{H}$ NMR(400MHz, $\text{CDCl}_3$ ): 1.39 (s, 18H), 4.39 (s, 4H), 7.63-7.64 (m, 8H);  $^{13}\text{C}$  NMR (100 MHz,  $\text{CDCl}_3$ ):  $\delta$  = 27.9, 44.1, 83.9, 109.8, 126.1, 126.6, 130.1, 132.4, 147.3, 162.0, 167.3 ppm; HRMS (TOF-ESI $^+$ ):  $m/z$  calcd for  $[\text{C}_{30}\text{H}_{30}\text{Br}_2\text{N}_2\text{O}_2\text{Na}]^+$ : 695.0368; found: 695.0373.

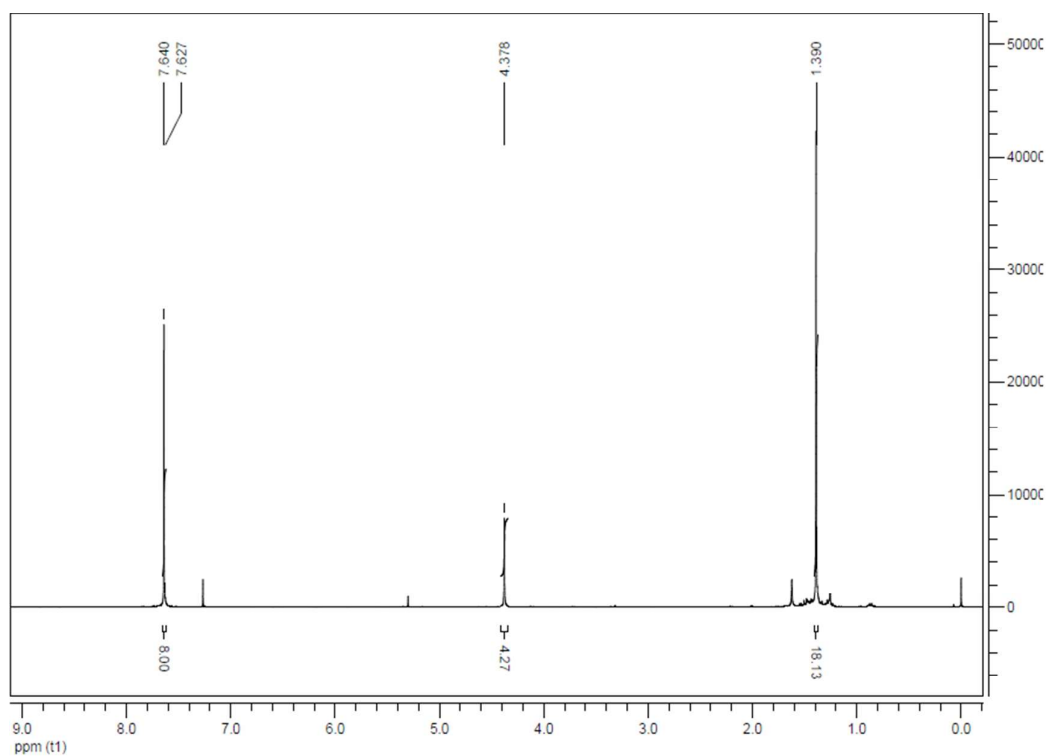

$^1\text{H}$ NMR (400MHz, $\text{CDCl}_3$ ) of Compound Br-DPP-3



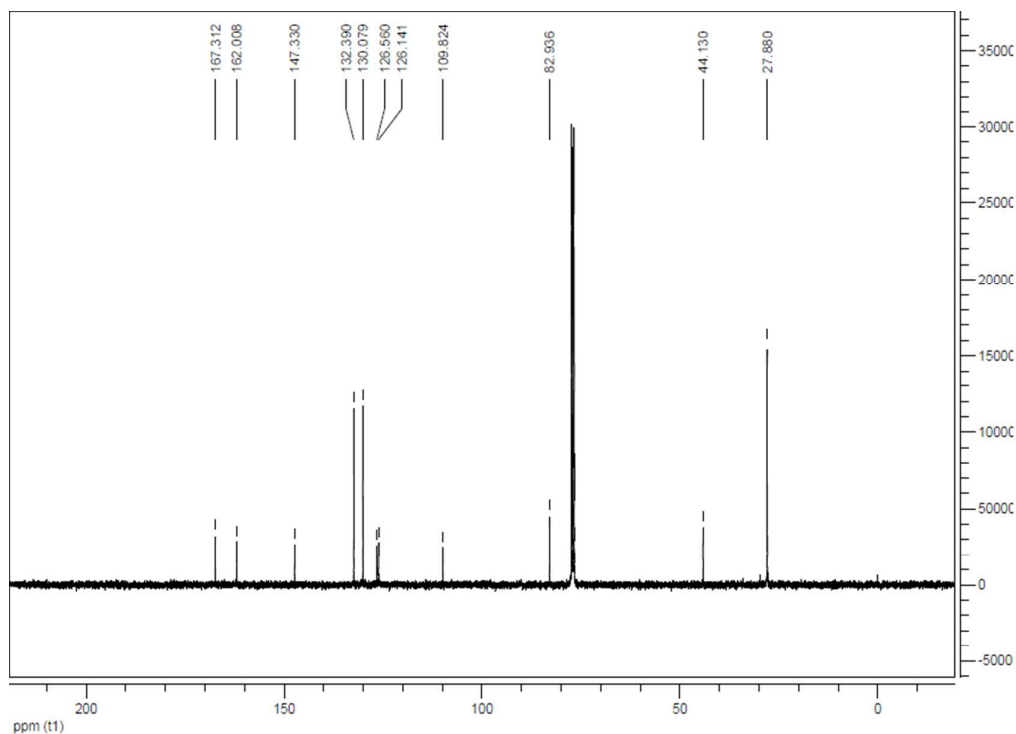

$^{13}\text{C}$  NMR (100 MHz,  $\text{CDCl}_3$ ) of Compound Br-DPP-3

#### Elemental Composition Report

Page 1

##### Single Mass Analysis

Tolerance = 50.0 PPM / DBE: min = -1.5, max = 100.0

Element prediction: Off

Number of isotope peaks used for i-FIT = 3

Monoisotopic Mass, Even Electron Ions

118 formula(e) evaluated with 1 results within limits (up to 1 closest results for each mass)

Elements Used:

C: 0-30 H: 0-31 N: 0-2 O: 0-6 Na: 0-1 Br: 0-2

LM-WANG

ECUST institute of Fine Chem

WL-BSM-003 50 (0.402) Cm (48:52)

14-May-2016

21:10:57

1: TOF MS ES+

4.58e+003

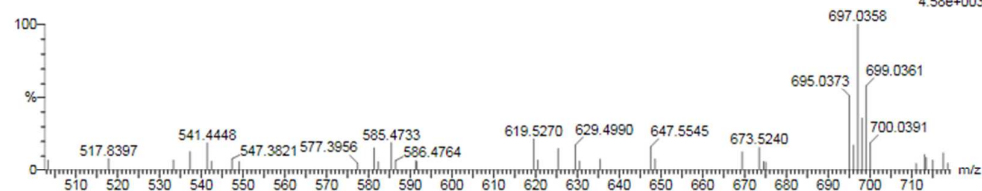

Minimum:

Maximum:

300.0 50.0 -1.5  
100.0

Mass

Calc. Mass

mDa

PPM

DBE

i-FIT

i-FIT (Norm)

Formula

695.0373

695.0368

0.5

0.7

15.5

7.3

0.0

C30 H30 N2 O6 Na Br2

HRMS (TOF-ESI<sup>+</sup>) of Compound Br-DPP-3

Compound Br-DPP-4 :  $^1\text{H}$ NMR (400MHz,  $\text{CDCl}_3$ ): 1.29 (s, 12H), 4.78 (s, 4H), 6.92 (d,  $J = 8.8$  Hz, 4H), 7.36 (d,  $J = 8.8$  Hz, 4H), 7.70 (s, 8H);  $^{13}\text{C}$  NMR (100 MHz,  $\text{CDCl}_3$ ):  $\delta = 31.7, 34.5, 43.6, 110.0, 120.4, 126.2, 126.5, 126.6, 130.1, 132.7, 147.3, 147.8, 149.3, 162.0, 167.1$  ppm; HRMS (TOF-ESI+):  $m/z$  calcd for  $[\text{C}_{42}\text{H}_{38}\text{Br}_2\text{N}_2\text{O}_2\text{Na}]^+$ : 847.0994; found: 847.0987.

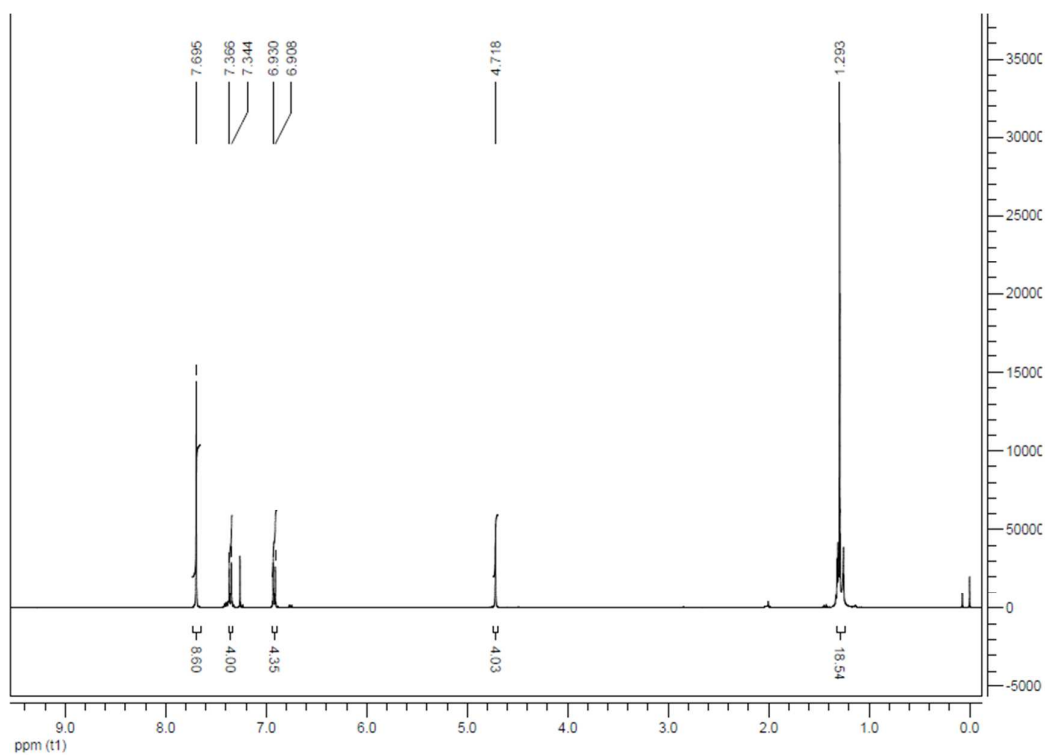

$^1\text{H}$ NMR (400MHz,  $\text{CDCl}_3$ ) of Compound Br-DPP-4

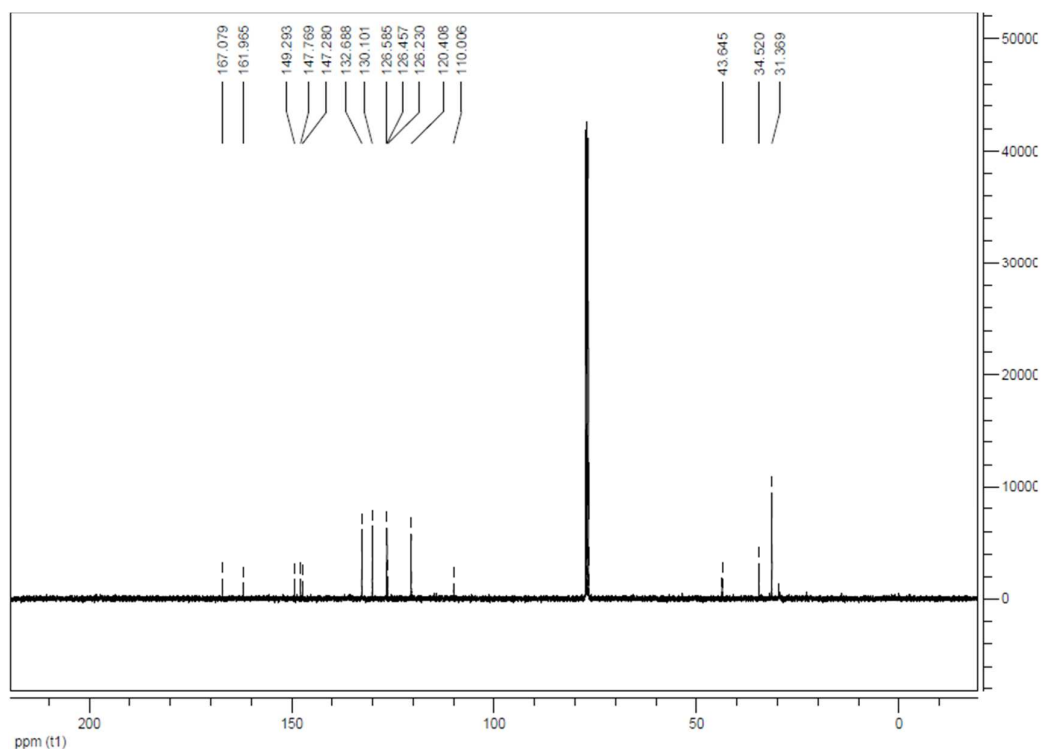

$^{13}\text{C}$  NMR (100 MHz,  $\text{CDCl}_3$ ) of Compound Br-DPP-4

# Elemental Composition Report

Page 1

## Single Mass Analysis

Tolerance = 50.0 PPM / DBE: min = -1.5, max = 100.0

Element prediction: Off

Number of isotope peaks used for i-FIT = 3

Monoisotopic Mass, Even Electron Ions

112 formula(e) evaluated with 1 results within limits (up to 1 closest results for each mass)

Elements Used:

C: 0-42 H: 0-39 N: 0-2 O: 0-6 Na: 0-1 Br: 0-2

LM-WANG

ECUST institute of Fine Chem

14-May-2016

21:18:14

1: TOF MS ES+

1.44e+003

WL-BSM-004 11 (0.162) Cm (10:11)

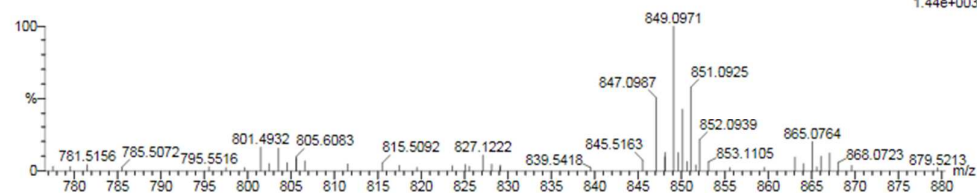

Minimum:

Maximum:

300.0 50.0 -1.5

100.0

Mass Calc. Mass mDa PPM DBE i-FIT i-FIT (Norm) Formula

847.0987 847.0994 -0.7 -0.8 23.5 29.3 0.0 C42 H38 N2 O6 Na Br2

HRMS (TOF-ESI+) of Compound Br-DPP-4

### General procedure for DPP-PPN-m

tetrakis(4-ethynylphenyl)methane (1 equiv, 50 mg, 0.12 mmol) and the appropriate Br-DPP-m (2 equiv, 0.24 mmol) in toluene/ triethylamine (1:1 v/v 3 mL) at 80 °C using Palladium(0)tetrakis(triphenylphosphine) (0.14 mol%, 20 mg) and copper(I) iodide (0.26 mol%, 6 mg) as catalysis for 3d. After cooling to room temperature the precipitated polymers was isolated by filtration over a Büchner funnel and washed with 1 M hydrochloric acid (20 mL), followed with excess methanol, tetrahydrofuran and dichloromethane. Then the product was further extracted with dichloromethane by Soxhlet apparatus for 24 h. The solvent was removed under vacuum at room temperature to afford the DPP-PPN-m. Anal. Calcd. for DPP-PPN-1: C, 83.96; H, 5.08; N, 5.08. Found: C, 82.79; H, 4.56; N, 4.01; Anal. Calcd. for DPP-PPN-2: C, 77.27; H, 4.80; N, 4.20. Found: C, 76.86; H, 4.46; N, 3.81; Anal. Calcd. for DPP-PPN-3: C, 77.25; H, 5.54; N, 3.88. Found: C, 73.20; H, 5.04; N, 3.28; Anal. Calcd. for DPP-PPN-4: C, 80.23; H, 5.49; N, 3.20. Found: C, 79.45; H, 4.67; N, 3.01.

### Calculation of energy transfer efficiency $\Phi_{ET}$ <sup>4</sup>

$\Phi_{ET}$  value was calculated by the following equation:

$$\Phi_{ET} = k_e / (k_o + k_e) \text{ , eq. S1}$$

Where  $k_e$  refers to the energy transfer constant and  $K_o$  represents the sum of radiative and non-radiative constants.  $k_e$  and  $K_o$  value were calculated from lifetime of donor molecule  $\tau_0$  and donor molecule in the presence of acceptor  $\tau_{D-A}$ .  $\tau_0=1/ k_o$  and  $\tau_{D-A}=1/( k_o+ k_e)$ .

Calculation of spectral overlap integral (J) and Förster critical radius ( $R_0$ )<sup>5</sup>

Spectral overlap integral (J) value was calculated by the following equation:

$$J = \int F(\lambda)\varepsilon(\lambda)\lambda^4 d\lambda \quad , \text{eq. S2}$$

Where  $F(\lambda)$  is the fluorescence spectrum of the donor normalized so that  $\int_0^\infty F(\lambda)d\lambda = 1$ . Refers to the molar extinction spectrum of the acceptor. For  $R_0$  in Å,  $\lambda$  in nm, J in  $M^{-1} cm^{-1} nm^4$ , we can obtain:

$$R_0 = 0.2108(\kappa^2\Phi_D n^{-4}J)^{1/6}, \text{eq. S3}$$

Where  $\kappa^2$  is orientational factor,  $\Phi_D$  is fluorescence quantum yield of the donor and  $n$  is the refractive index of the medium. In this work,  $\kappa^2$  and  $\Phi_D$  are assumed to be equal to 2/3 and 0.1, respectively.

Table S1 element analysis of DPP-PPNs

|           | Calculated |      |      | Found |      |      |
|-----------|------------|------|------|-------|------|------|
|           | C%         | H%   | N%   | C%    | H%   | N%   |
| DPP-PPN-1 | 83.96      | 5.08 | 5.08 | 82.79 | 4.56 | 4.01 |

|           |       |      |      |       |      |      |
|-----------|-------|------|------|-------|------|------|
| DPP-PPN-2 | 77.27 | 4.80 | 4.20 | 76.86 | 4.46 | 3.81 |
| DPP-PPN-3 | 77.25 | 5.54 | 3.88 | 73.20 | 5.04 | 3.28 |
| DPP-PPN-4 | 80.23 | 5.49 | 3.20 | 79.45 | 4.67 | 3.01 |

Table S2 ET efficiency, overlap integral and foster radius of reported energy transfer system

| ET systems                             | ET efficiency (%) | Overlap integral ( $M^{-1}cm^{-1}nm^4$ ) | Foster radius ( $R_0$ ) (nm) | Reference |
|----------------------------------------|-------------------|------------------------------------------|------------------------------|-----------|
| DPB-BI-1                               | 65                | $6.25 \times 10^{-14} M^{-1}cm^3$        | 23                           | 4         |
| DPB-BI-1                               | 53                | $6.25 \times 10^{-14} M^{-1}cm^3$        | 23                           |           |
| BI@2                                   | 72                | $4.57 \times 10^{-14} M^{-1}cm^3$        | 21                           |           |
| PP-CMP $\Rightarrow$ coumarin 6        | 91                |                                          |                              | 6         |
| Zn <sub>2</sub> (ZnTCPP) based MOF (1) | 15                | $4.1 \times 10^{-14} cm^{-6}$            | 3                            | 7         |
| TPE-NCMP-4/NR                          | 90                |                                          |                              | 8         |
| QTH+NR                                 | 56.6              | $1.17 \times 10^{15} M^{-1}cm^{-1}nm^4$  | 32.3                         | 9         |
| CS-PS clay hybrids (state-A)           | 50                |                                          |                              | 10        |
| CS-PS clay hybrids (state-B)           | 10                |                                          |                              |           |
| Rh6G in Au-MCM-41 solution             | 51.8              |                                          |                              | 11        |

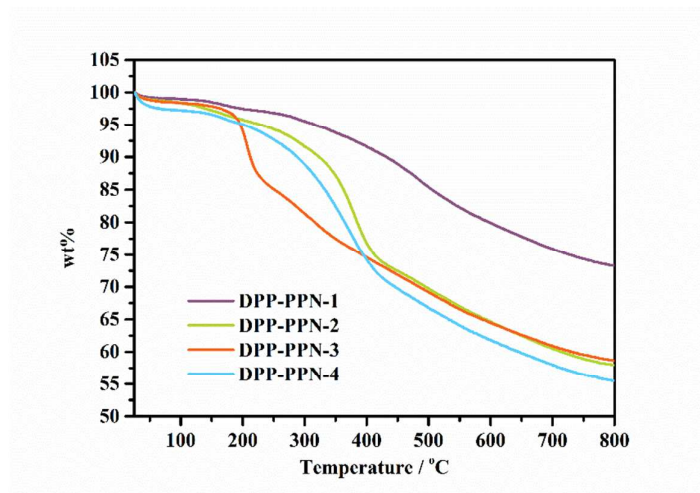

Fig. S1 Thermogravimetric analysis of DPP-PPN-m

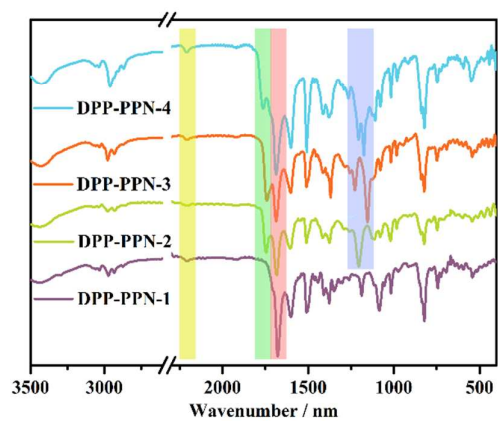

Fig. S2 Fourier transform infrared spectroscopy of DPP-PPN-m

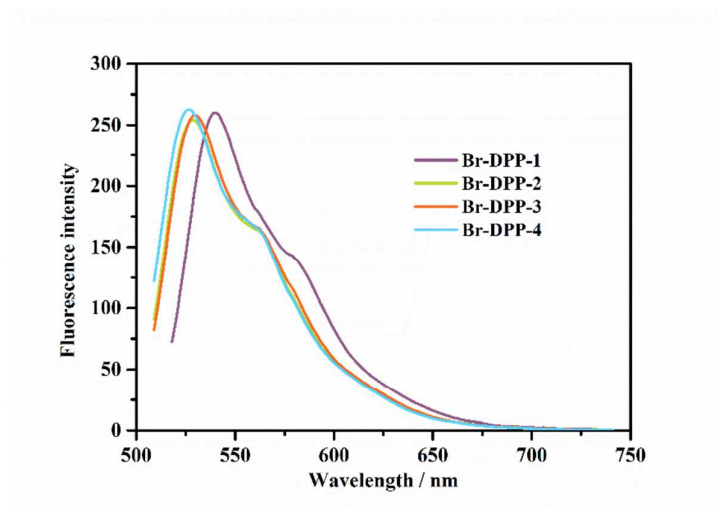

Fig. S3 Fluorescence spectra of monomers (Br-DPP-m)

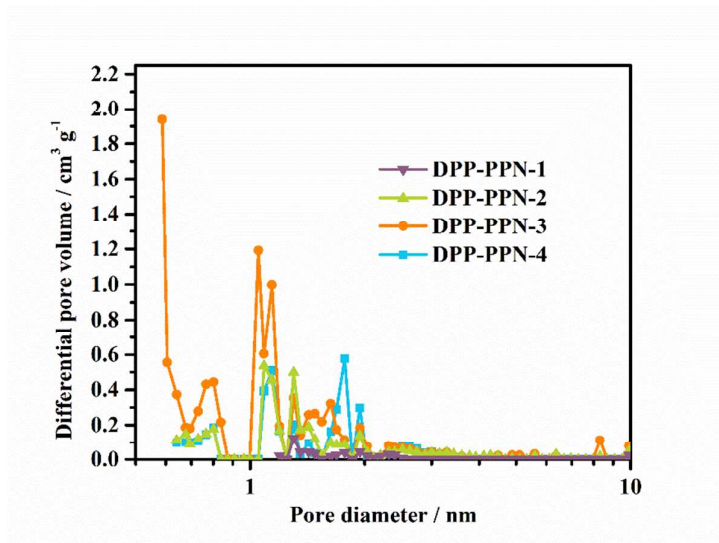

Fig.S4 Pore size distribution of DPP-PPN-m

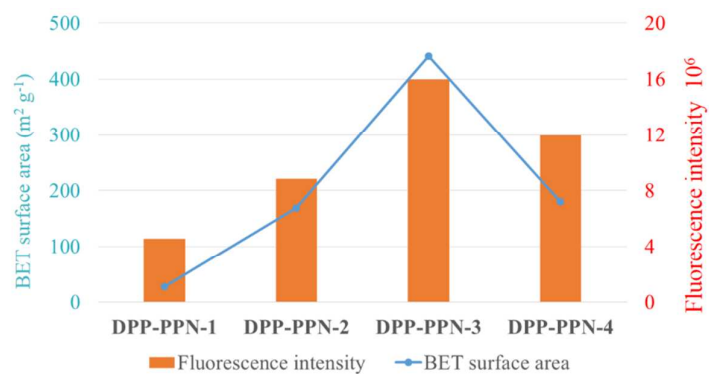



Fig. S5 Comparative analysis of data plots between fluorescence intensity and BET surface area for DPP-PPN-m.

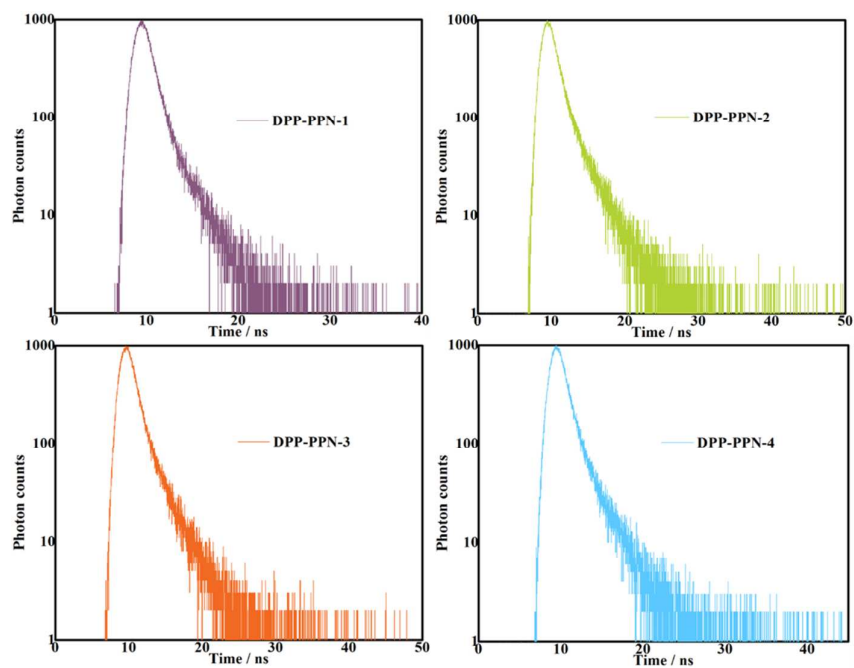

Fig. S6 Fluorescence decay profiles of DPP-PPN-m

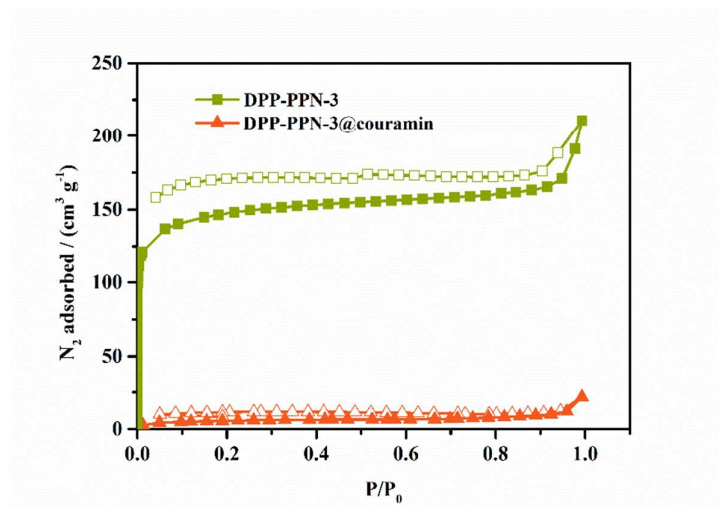

Fig.S7 Nitrogen adsorption isotherms before and after loading of couramin.

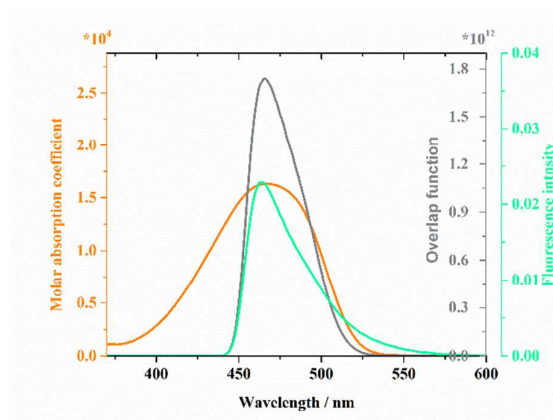

Fig. S8 Förster analysis of coumarin@DPP-PPN-3 illustrating the spectral overlap of DPP-PPN-3 acceptor and coumarin donor. green line: fluorescence spectrum of coumarin (donor); orange line: molar extinction spectrum of Br-DPP-3 (acceptor); grey line: overlap function  $f(\lambda) = F(\lambda)\epsilon(\lambda)\lambda^4$ . The spectral overlap integral (J) value was calculated to be  $6.68 \times 10^{14} \text{ M}^{-1} \text{ cm}^{-1} \text{ nm}^4$ . The estimated  $R_0$  value was calculated to be 31 Å according to eq. S3.

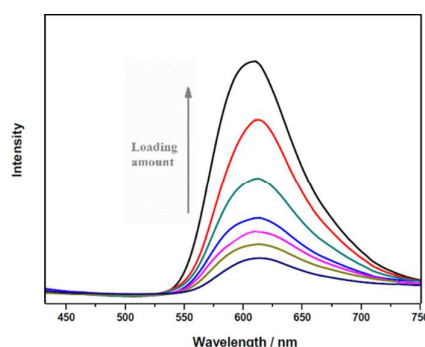

Fig. S9 Fluorescence spectral change of coumarin@DPP-PPN-3 with different coumarin contents (0-23.4 mol%) upon excitation at 390 nm.

## References

- 1 Qu, Y.; Hua, J.; Tian, H., Colorimetric and ratiometric red fluorescent chemosensor for fluoride ion based on diketopyrrolopyrrole. *Org. Lett.*, **2010**, *12*, 3320-3323.
- 2 Pandey, P.; Farha, O. K.; Spokoyny, A. M.; Mirkin, C. A.; Kanatzidis, M. G.; Hupp, J. T.; Nguyen, S. T., A “click-based” porous organic polymer from tetrahedral building blocks. *J. Mater Chem.*, **2011**, *21*, 1700-1703.

- 3 Wu, M.; He, T.; Li, K.; Wu, M.; Huang, Z.; Yu, X., A real-time colorimetric and ratiometric fluorescent probe for sulfite. *Analyst*, **2013**, *138*, 3018-3025.
- 4 Dolgoplova, E. A.; Williams, D. E.; Greytak, A. B.; Rice, A. M.; Smith, M. D.; Krause, J. A.; Shustova, N. B., A Bio-inspired Approach for Chromophore Communication: Ligand-to-Ligand and Host-to-Guest Energy Transfer in Hybrid Crystalline Scaffolds. *Angew. Chem. Int. Ed.* **2015**, *54*, 13639-13643.
- 5 B. Valeur, in *Molecular Fluorescence*, Wiley-VCH Verlag GmbH, **2001**, DOI: 10.1002/3527600248.ch4, pp. 72.
- 6 Chen L, Honsho Y, Seki S, Jiang D. Light-harvesting conjugated microporous polymers: rapid and highly efficient flow of light energy with a porous polyphenylene framework as antenna. *J. Am. Chem. Soc.* **2010**, *132*, 6742-6748.
- 7 Williams DE, Rietman JA, Maier JM, et al. Energy Transfer on Demand: Photoswitch-Directed Behavior of Metal–Porphyrin Frameworks. *J. Am. Chem. Soc.* **2014**, *136*, 11886-11889.
- 8 Zhang, P.; Wu, K.; Guo, J.; Wang, C., From hyperbranched polymer to nanoscale CMP (NCMP): improved microscopic porosity, enhanced light harvesting, and enabled solution processing into white-emitting Dye@ NCMP films. *ACS Macro Lett.*, **2014**, *3*, 1139-1144.
- 9 Bhattacharyya, S.; Jana, B.; Patra, A., Multichromophoric organic molecules encapsulated in polymer nanoparticles for artificial light harvesting. *ChemPhysChem*, **2015**, *16*, 796-804.
- 10 Rao, K. V.; Datta, K. K. R.; Eswaramoorthy, M.; George, S. J., Light–Harvesting Hybrid Hydrogels: Energy–Transfer–Induced Amplified Fluorescence in Noncovalently Assembled Chromophore–Organoclay Composites. *Angew. Chem. Int. Ed.*, **2011**, *123*, 1211-1216.
- 11 Sen, T.; Jana, S.; Koner, S.; Patra, A., Energy transfer between confined dye and surface attached Au nanoparticles of mesoporous silica. *J. Phys. Chem. C.*, **2009**, *114*, 707-714.
